# Supplementary material for: Noninvasive drug adherence monitoring of antipsychotic patients via finger sweat testing
Source: Frontiers journal article supplement (doi:10.3389/fchem.2023.1245089), 2023-08-31
Supplement: Data_Sheet_1.PDF [file Data_Sheet_1.PDF]

## Supplementary Material

### Noninvasive drug adherence monitoring of antipsychotic patients via finger sweat testing

K. Longman, C. Frampas, H. Lewis, C. Costa, R. Nilforooshan, M. Chambers, and M. Bailey\*

\* **Correspondence:** Professor Melanie Bailey: [m.bailey@surrey.ac.uk](mailto:m.bailey@surrey.ac.uk)

#### 1 Patient Metadata

**Supplementary Table 1.** Summary of all participants included within this study, including patients, contact only and negative control group.

| Population                      | Participant ID | Antipsychotic Drug | Dose (mg) <sup>1</sup> | Time since last dose (hrs) | Finger Sweat Type <sup>2</sup> |
|---------------------------------|----------------|--------------------|------------------------|----------------------------|--------------------------------|
| Patients<br>(finger sweat only) | AP-038         | Olanzapine         | 20                     | 16                         | AP, AW                         |
|                                 | AP-039         | Quetiapine         | 300                    | 16.5                       | AP, AW                         |
|                                 | AP-040         | Olanzapine         | 10                     | 17                         | AP, AW                         |
|                                 | AP-041         | Olanzapine         | 20                     | 18                         | AP, AW                         |
|                                 | AP-042         | Quetiapine         | 300                    | 4                          | AP, AW                         |
|                                 | AP-044         | Olanzapine         | 20                     | 20                         | AP, AW                         |
|                                 | AP-045         | Clozapine          | 375                    | 19                         | AP, AW                         |
|                                 | AP-046         | Quetiapine         | 100                    | 6                          | AP, AW                         |
|                                 | AP-047         | Olanzapine         | 7.5                    | 19                         | AP, AW                         |
|                                 | AP-048         | Quetiapine         | 300                    | 20                         | AP, AW                         |
|                                 | AP-050         | Quetiapine         | Unknown                | Unknown                    | AP, AW                         |
|                                 | AP-104         | Clozapine          | 250                    | 21                         | AP, AW                         |
|                                 | AP-105         | Clozapine          | 250                    | 19                         | AP, AW                         |
|                                 | AP-109         | Clozapine          | 25                     | 6.5                        | AP, AW                         |
|                                 | AP-110         | Olanzapine         | 300 *                  | 66                         | AP, AW                         |
|                                 | AP-111         | Clozapine          | 250                    | 18.5                       | AP, AW                         |
|                                 | AP-112         | Clozapine          | 100                    | 7                          | AP, AW                         |
|                                 | AP-113         | Clozapine          | 150                    | 7                          | AP, AW                         |
|                                 | AP-115         | Clozapine          | 250                    | 12                         | AP, AW                         |
|                                 | AP-116         | Clozapine          | 125                    | 12                         | AP, AW                         |
|                                 | AP-117         | Clozapine          | 100                    | < 1                        | AP, AW                         |
|                                 | AP-118         | Clozapine          | 500                    | 5.5                        | AP, AW                         |
|                                 | AP-119         | Clozapine          | 275                    | 5                          | AP, AW                         |
|                                 | AP-120         | Clozapine          | 200                    | < 1                        | AP, AW                         |
|                                 | AP-121         | Clozapine          | 200                    | 11.5                       | AP, AW                         |
|                                 | AP-122         | Clozapine          | 275                    | 12                         | AP, AW                         |

|                 |        |            |       |      |           |
|-----------------|--------|------------|-------|------|-----------|
|                 | AP-123 | Clozapine  | 200   | 15.5 | AP, AW    |
|                 | AP-124 | Clozapine  | 100   | 6.5  | AP, AW    |
|                 | AP-125 | Clozapine  | 350   | 18.5 | AP, AW    |
|                 | AP-126 | Clozapine  | 200   | 2.5  | AP, AW    |
|                 | AP-127 | Clozapine  | 140   | 14   | AP, AW    |
|                 | AP-128 | Olanzapine | 20    | 14.5 | AP, AW    |
|                 | AP-129 | Clozapine  | 350   | 13   | AP, AW    |
|                 | AP-130 | Olanzapine | 2.5   | 13   | AP, AW    |
|                 | AP-131 | Olanzapine | 10    | 25.5 | AP, AW    |
|                 | AP-132 | Olanzapine | 20    | 16   | AP, AW    |
|                 | AP-133 | Olanzapine | 20    | 16.5 | AP, AW    |
|                 | AP-134 | Olanzapine | 15    | 13   | AP, AW    |
|                 | AP-135 | Olanzapine | 15    | 14.5 | AP, AW    |
|                 | AP-136 | Clozapine  | 100   | 5    | AP, AW    |
|                 | AP-137 | Clozapine  | 275   | 14   | AP, AW    |
|                 | AP-139 | Olanzapine | 420 * | < 1  | AP, AW    |
|                 | AP-140 | Olanzapine | 300 * | < 1  | AP, AW    |
|                 | AP-141 | Quetiapine | 500   | 26   | AP, AW    |
|                 | AP-142 | Clozapine  | 225   | 5.5  | AP, AW    |
|                 | AP-143 | Olanzapine | 300 * | < 1  | AP, AW    |
|                 | AP-144 | Olanzapine | 405 * | < 1  | AP, AW    |
|                 | AP-146 | Quetiapine | 100   | 16.5 | AP, AW    |
|                 | AP-147 | Olanzapine | 300 * | 24   | AP, AW    |
|                 | AP-148 | Olanzapine | 405 * | < 1  | AP, AW    |
|                 | AP-149 | Olanzapine | 405 * | < 1  | AP, AW    |
|                 | AP-151 | Clozapine  | 250   | 24   | AP, AW    |
|                 | AP-152 | Clozapine  | 200   | 13   | AP, AW    |
|                 | AP-153 | Clozapine  | 275   | 24   | AP, AW    |
|                 | AP-154 | Clozapine  | 300   | 3    | AP, AW    |
|                 | AP-155 | Clozapine  | 150   | 19   | AP, AW    |
|                 | AP-156 | Clozapine  | 200   | 13.5 | AP, AW    |
|                 | AP-157 | Clozapine  | 200   | 13   | AP, AW    |
|                 | AP-158 | Clozapine  | 300   | 2    | AP, AW    |
|                 | AP-159 | Clozapine  | 250   | 12   | AP, AW    |
| Plasma subgroup | PS-001 | Clozapine  | 100   | 16   | AP, AW, P |
|                 | PS-002 | Clozapine  | 450   | 16   | AP, AW, P |
|                 | PS-003 | Clozapine  | 275   | 14   | AP, AW, P |
|                 | PS-004 | Clozapine  | 550   | 14   | AP, AW, P |
|                 | PS-005 | Clozapine  | 25    | 11.5 | AP, AW, P |
|                 | PS-006 | Clozapine  | 500   | 15.5 | AP, AW, P |
|                 | PS-007 | Clozapine  | 550   | 12   | AP, AW, P |
|                 | PS-008 | Clozapine  | 400   | 11   | AP, AW, P |
|                 | PS-009 | Clozapine  | 300   | 14.5 | AP, AW, P |
|                 | PS-010 | Clozapine  | 500   | 1.5  | AP, AW, P |
|                 | PS-011 | Clozapine  | 300   | 15   | AP, AW, P |

|                        |                |            |   |   |                          |
|------------------------|----------------|------------|---|---|--------------------------|
| Contact only           | CO-003         | Quetiapine | - | - | AP, AW                   |
|                        | CO-004         | Quetiapine | - | - | AP, AW                   |
|                        | CO-005         | Olanzapine | - | - | AP, AW                   |
|                        | CO-006         | Olanzapine | - | - | AP, AW                   |
|                        | CO-007         | Clozapine  | - | - | AP, AW                   |
|                        | CO-008         | Clozapine  | - | - | AP, AW                   |
| Negative control group | BG-001 to -030 | -          | - | - | Right index only: AP, AW |

<sup>1</sup> mg per day (orally), excluding monthly depot injection where samples marked as \*.

<sup>2</sup> (AP) finger sweat as presented, (AW) finger sweat after hand washing and (P) plasma.

## 2 Mass Spectrometer Operating Conditions

**Supplementary Table 2.** Operating conditions of the Thermo Scientific™ Q Exactive™ Plus Hybrid Quadrupole-Orbitrap™ Mass Spectrometer.

| Parameter                   | Operating Condition                            |
|-----------------------------|------------------------------------------------|
| Spray voltage               | 4.0 kV                                         |
| Capillary temperature       | 320 °C                                         |
| S-lens RF level             | 50                                             |
| Sheath gas flow rate        | 35                                             |
| Aux gas flow rate           | 8                                              |
| Scan range                  | $m/z$ 100 to $m/z$ 500                         |
| Resolution                  | 70 000 at $m/z$ 200                            |
| Polarity                    | Positive                                       |
| AGC target                  | 1e6                                            |
| Maximum inject time         | 200                                            |
| MS/MS Parameter             | Operating condition                            |
| Mode                        | FSMS / dd-MS <sup>2</sup> with inclusion lists |
| Resolution                  | 35 000 at $m/z$ 200                            |
| Loop Count                  | 2                                              |
| Normalised Collision Energy | 30, 70, 110                                    |
| Dynamic Exclusion           | 10 seconds                                     |

### 3 Finger Sweat Method Performance Data

#### 3.1 Selectivity

(A)

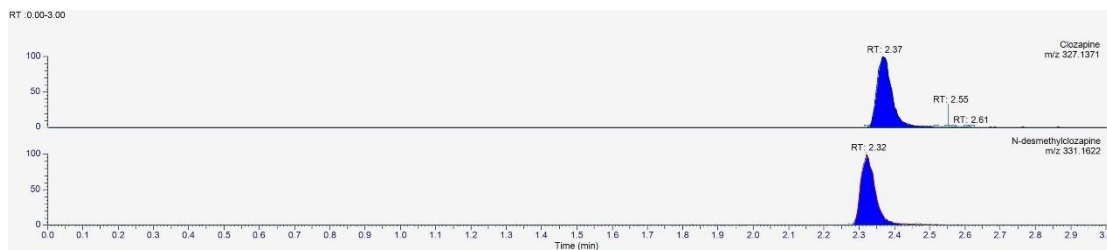

(B)

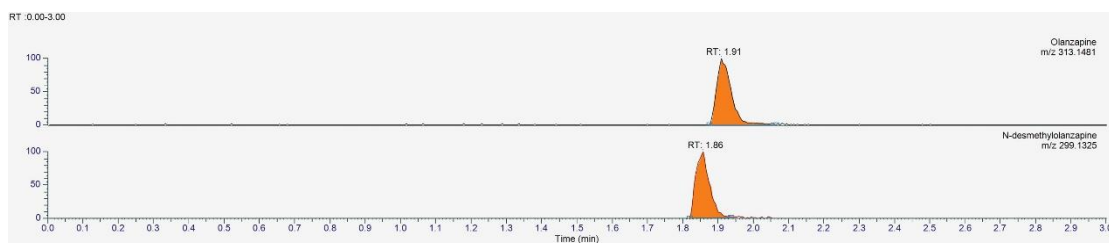

(C)

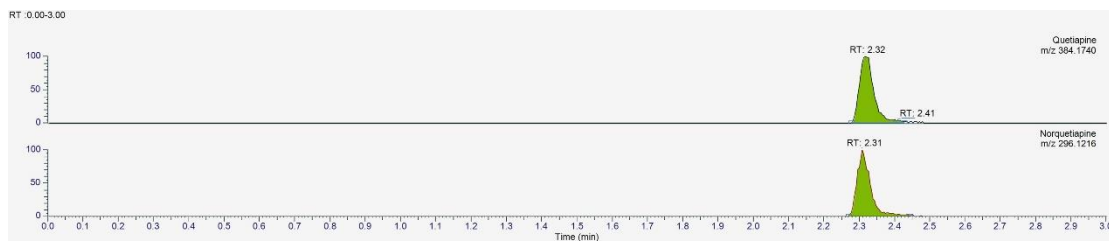

**Supplementary Figure 1.** Ion extracted chromatograms for (A) clozapine and N-desmethylozapine, (B) olanzapine and N-desmethyloanzapine and (C) quetiapine and norquetiapine in standard solution.

### 3.2 Linearity and LOD

**Supplementary Table 3.** The limit of detection, working range and associated  $R^2$  values for all antipsychotic drugs and metabolites extracted from paper. The LOD is defined as the lowest mass extracted from paper which could be determined with a RSD < 20%.

| Analyte              | Internal Standard (pg) | LOD (pg) | Working Range (pg)  | $R^2$            |
|----------------------|------------------------|----------|---------------------|------------------|
| Clozapine            | 200; 350               | 30       | 60 – 360; 100 – 600 | > 0.990; > 0.992 |
| N-desmethyloclapine  | 200; 350               | 50       | 60 – 360; 100 – 600 | > 0.973; > 0.995 |
| Olanzapine           | 350                    | 50       | 100 – 600           | > 0.993          |
| N-desmethyloanzapine | 350                    | 100      | 100 – 600           | > 0.989          |
| Quetiapine           | 100                    | 10       | 30 – 180            | > 0.986          |
| Norquetiapine        | 100                    | 20       | 30 – 180            | > 0.994          |

### 3.3 Accuracy and precision

**Supplementary Table 4.** Precision data for finger sweat methodology: qualitative analysis of clozapine, N-desmethyloclapine, olanzapine, N-desmethyloanzapine, quetiapine and norquetiapine QC samples using LC-MS.

| Analyte | Mass deposited on paper (pg) | Intra-day                                       | Inter-day |                                                 |         |
|---------|------------------------------|-------------------------------------------------|-----------|-------------------------------------------------|---------|
|         |                              | Analyte-to-internal standard ratio <sup>a</sup> | RSD (%)   | Analyte-to-internal standard ratio <sup>a</sup> | RSD (%) |
| CLZ     | 90                           | 0.509 ± 0.009                                   | 1.78      | 0.513 ± 0.005                                   | 0.99    |
|         | 200                          | 1.176 ± 0.014                                   | 1.15      | 1.185 ± 0.033                                   | 2.82    |
|         | 330                          | 1.923 ± 0.039                                   | 2.04      | 1.885 ± 0.014                                   | 0.74    |
| NDMC    | 90                           | 0.439 ± 0.008                                   | 1.79      | 0.442 ± 0.024                                   | 5.35    |
|         | 200                          | 0.995 ± 0.002                                   | 0.17      | 1.009 ± 0.032                                   | 3.13    |
|         | 330                          | 1.603 ± 0.033                                   | 2.07      | 1.598 ± 0.116                                   | 7.28    |
| OLZ     | 150                          | 0.678 ± 0.019                                   | 2.79      | 0.668 ± 0.043                                   | 6.40    |
|         | 350                          | 3.459 ± 0.051                                   | 1.49      | 3.263 ± 0.974                                   | 29.83   |
|         | 550                          | 6.694 ± 0.173                                   | 2.58      | 6.077 ± 1.622                                   | 26.69   |
| DMO     | 150                          | 0.193 ± 0.015                                   | 7.81      | 0.237 ± 0.083                                   | 34.96   |
|         | 350                          | 1.522 ± 0.050                                   | 3.30      | 1.571 ± 0.389                                   | 24.75   |
|         | 550                          | 3.218 ± 0.067                                   | 2.08      | 3.037 ± 0.616                                   | 20.29   |
| QTP     | 40                           | 0.199 ± 0.001                                   | 0.30      | 0.203 ± 0.004                                   | 1.99    |
|         | 100                          | 0.540 ± 0.008                                   | 1.51      | 0.550 ± 0.011                                   | 2.02    |
|         | 160                          | 0.843 ± 0.018                                   | 2.18      | 0.828 ± 0.006                                   | 0.71    |
| NQTP    | 40                           | 0.261 ± 0.002                                   | 0.69      | 0.260 ± 0.015                                   | 5.58    |
|         | 100                          | 0.698 ± 0.006                                   | 0.91      | 0.737 ± 0.057                                   | 7.80    |
|         | 160                          | 1.084 ± 0.022                                   | 2.02      | 1.124 ± 0.141                                   | 12.50   |

<sup>a</sup> Results are expressed as mean ± standard deviation (n = 9 papers).

**Supplementary Table 5.** Accuracy and precision data for finger sweat methodology at the higher working range: analysis of clozapine and *N*-desmethylozapine QC samples using LC-MS.

| Analyte | Mass deposited on paper | Intra-day                    |     |      | Inter-day                    |     |      |
|---------|-------------------------|------------------------------|-----|------|------------------------------|-----|------|
|         |                         | Calculated mass <sup>a</sup> | RSD | RE   | Calculated mass <sup>a</sup> | RSD | RE   |
| CLZ     | 150                     | 157.7 ± 0.6                  | 0.4 | 5.2  | 157.3 ± 4.5                  | 2.9 | 4.9  |
|         | 350                     | 340.3 ± 2.8                  | 0.8 | -2.8 | 345.5 ± 6.6                  | 1.9 | -1.3 |
|         | 550                     | 522.0 ± 17.2                 | 3.3 | -5.1 | 534.0 ± 13.8                 | 2.6 | -2.9 |
| NDMC    | 150                     | 159.9 ± 0.6                  | 0.4 | 6.6  | 158.2 ± 3.3                  | 2.1 | 5.5  |
|         | 350                     | 346.9 ± 2.2                  | 0.6 | -0.9 | 351.0 ± 7.3                  | 2.1 | 0.3  |
|         | 550                     | 525.9 ± 16.6                 | 3.2 | -4.4 | 534.8 ± 20.5                 | 3.8 | -2.8 |

<sup>a</sup> Results are expressed as mean ± standard deviation (n = 9 papers). All masses are stated as pg, RSD and RE are expressed as %.

### 3.4 Recovery and matrix effect

Recovery from paper was assessed using a mid-range calibrator for each analyte. Recovery was >70% for CLZ/NDMC, >94% for OLZ/DMO at 300 pg, and >64% for QTP/NQTP at 90 pg. To evaluate matrix effect, analyte standard samples (500 pg) were extracted in the presence of finger sweat *as presented* and *after washing* from three donors. Matrix effect was <10% for antipsychotics and metabolites.

### 3.5 Carryover

Using injections on blank mobile phase after the highest calibrator standard, carryover was not observed.

### 3.6 Stability

Stability samples (100 pg on paper) were extracted and analysed over 48 hours whilst stored in the autosampler (5 °C). Stability of extracted samples was found to be sufficient for batch analysis (analyte-to-internal standard RSD < 15% for all analytes).

## 4 Plasma Method Performance Data

### 4.1 Selectivity

No interferences were observed within blank pooled plasma samples.

### 4.2 Linearity

Mean linearity of  $R^2 > 0.9991$  and  $> 0.9985$  for clozapine and N-desmethylozapine across three validation runs.

### 4.3 LOD and LLOQ

Clozapine and its metabolite detected as low as 10 ng/mL in spiked plasma; however, using validation guidelines, LLOQ was 25 ng/mL (RSD and RE  $< 20\%$ ).

### 4.4 Accuracy and precision

**Supplementary Table 6.** Accuracy and precision data for plasma methodology: analysis of clozapine and N-desmethylozapine QC samples using LC-MS.

| Analyte | Added concentration | Intra-day                |     |       | Inter-day                |     |       |
|---------|---------------------|--------------------------|-----|-------|--------------------------|-----|-------|
|         |                     | Calculated concentration | RSD | RE    | Calculated concentration | RSD | RE    |
| CLZ     | 75                  | 70.9 $\pm$ 0.2           | 1.7 | -5.5  | 72.6 $\pm$ 1.7           | 1.9 | -3.2  |
|         | 500                 | 479.4 $\pm$ 10.6         | 1.0 | -4.1  | 494.6 $\pm$ 4.3          | 0.7 | -1.09 |
|         | 1200                | 1243.6 $\pm$ 24.5        | 1.0 | 3.6   | 1236.3 $\pm$ 34.9        | 0.5 | 3.0   |
| NDMC    | 75                  | 64.4 $\pm$ 0.3           | 5.3 | -14.1 | 65.8 $\pm$ 2.3           | 3.6 | -12.3 |
|         | 500                 | 476.6 $\pm$ 24.1         | 3.6 | -4.7  | 513.7 $\pm$ 11.6         | 2.2 | 2.7   |
|         | 1200                | 1249.9 $\pm$ 30.1        | 0.9 | 4.2   | 1255.3 $\pm$ 55.1        | 2.0 | 4.6   |

<sup>a</sup> Results are expressed as mean  $\pm$  standard deviation (n = 3). All concentrations are stated as ng/mL, RSD and RE are expressed as %.

### 4.5 Carryover

Carryover was only observed over 500 ng/mL where it was  $< 1\%$  and therefore deemed negligible.

## 5 MS/MS Data

(A)

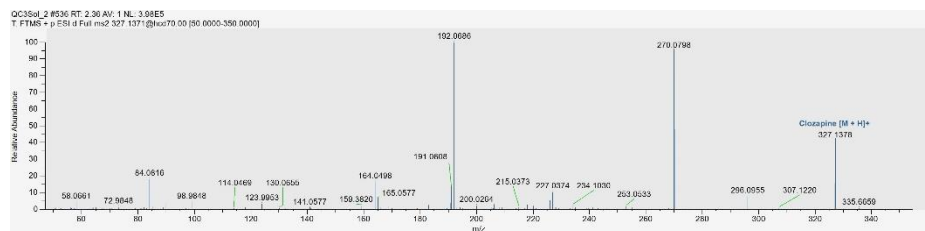

(B)

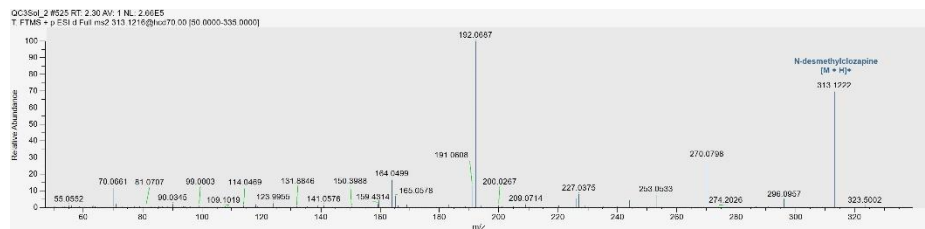

(C)

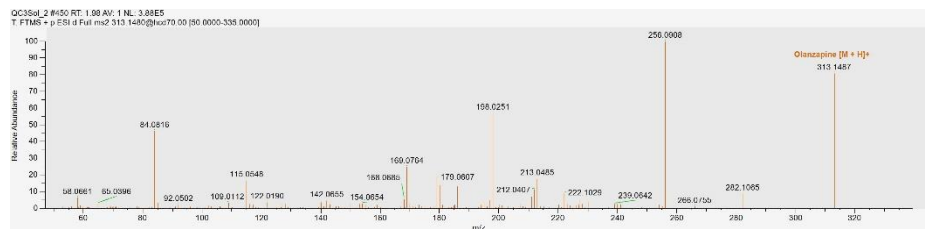

(D)

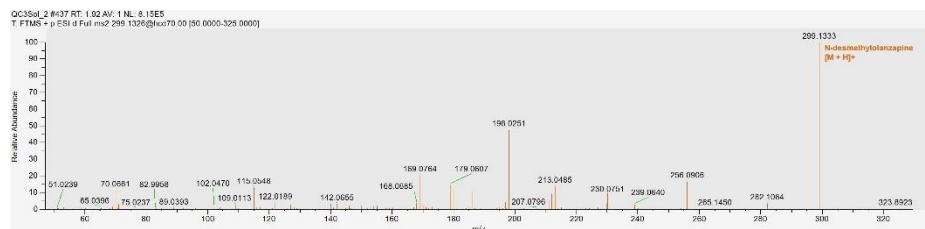

(E)

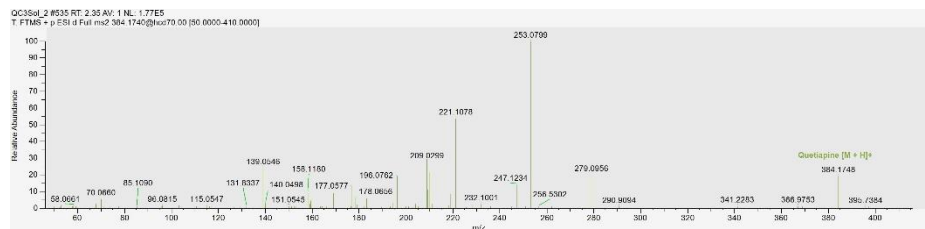

(F)

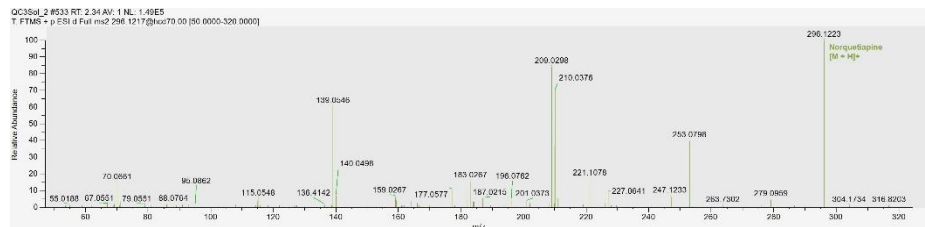

**Supplementary Figure 2.** Example MS/MS spectra for (A) clozapine, (B) N-desmethyloclapine, (C) olanzapine, (D) N-desmethyloclapine, (E) quetiapine and (F) norquetiapine from standard solution.



6 Negative Control Group Data

(A) Clozapine:

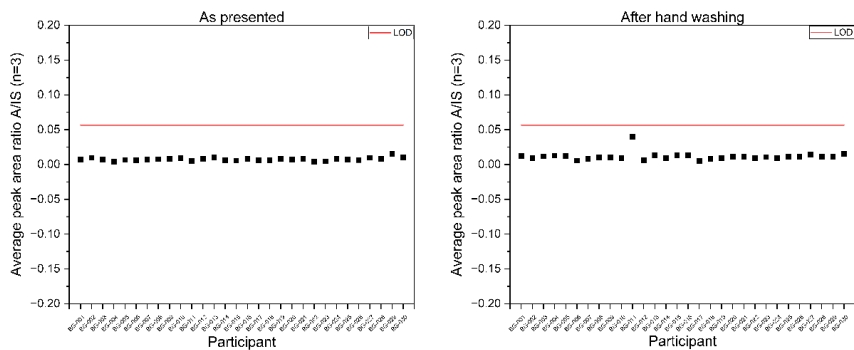

(B) N-desmethylozapine:

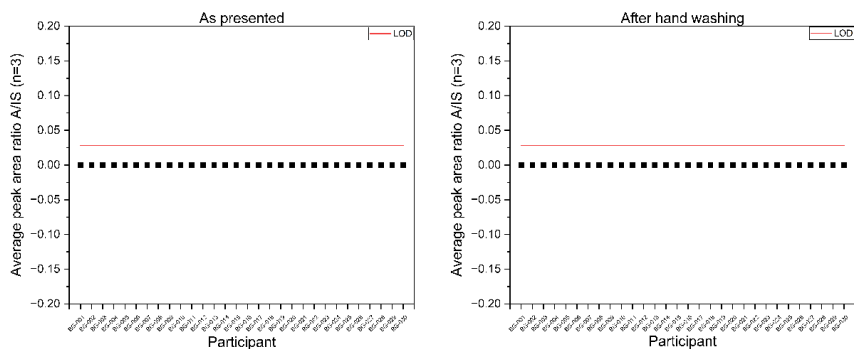

(C) Olanzapine:

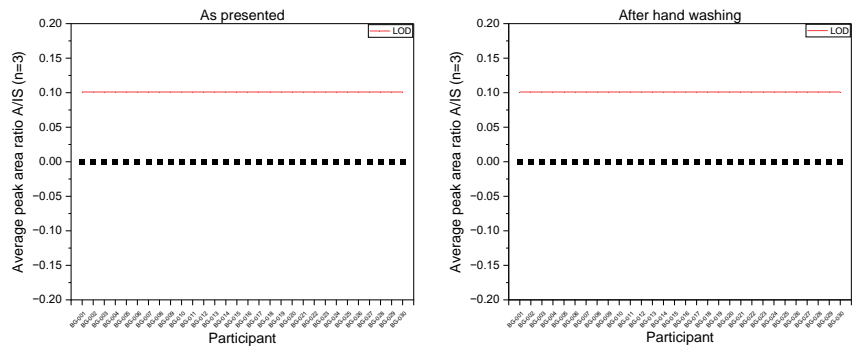

(D) N-desmethylolanzapine:

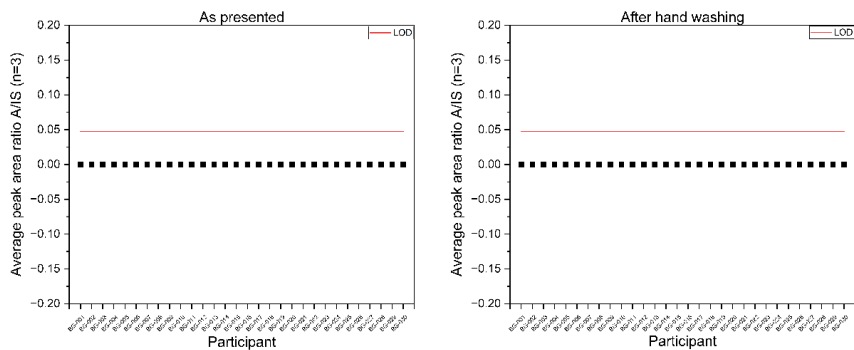

## (E) Quetiapine:

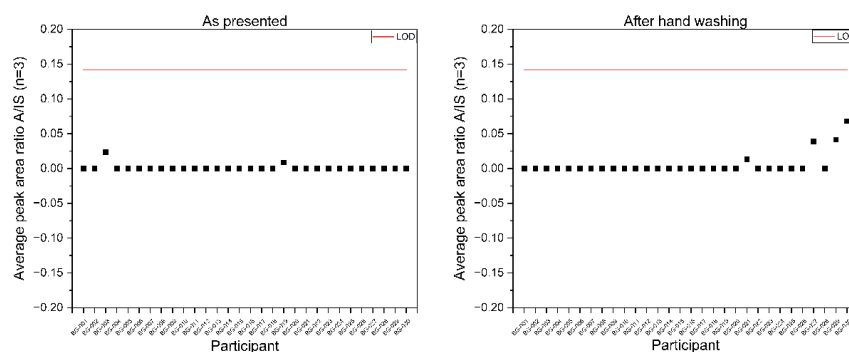

## (F) Norquetiapine:

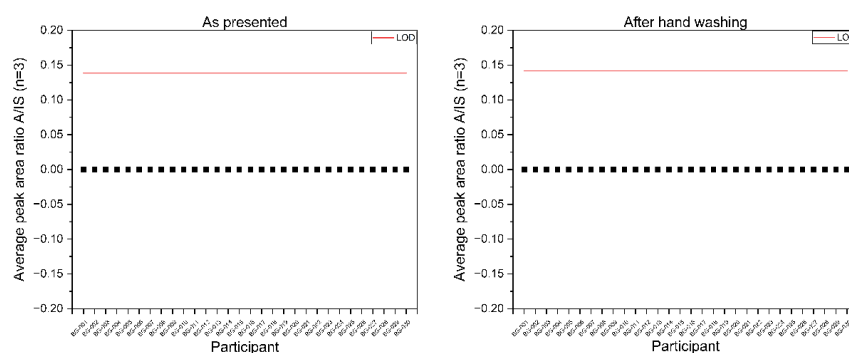

**Supplementary Figure 3.** Finger sweat screening results for (A) clozapine, (B) N-desmethylozapine, (C) olanzapine, (D) N-desmethyloanzapine, (E) quetiapine and (F) norquetiapine from the negative control group for samples collected “as presented” and “after washing” (n = 1 sample per participant per condition).

## 7 Drug Contact Versus Administration Data

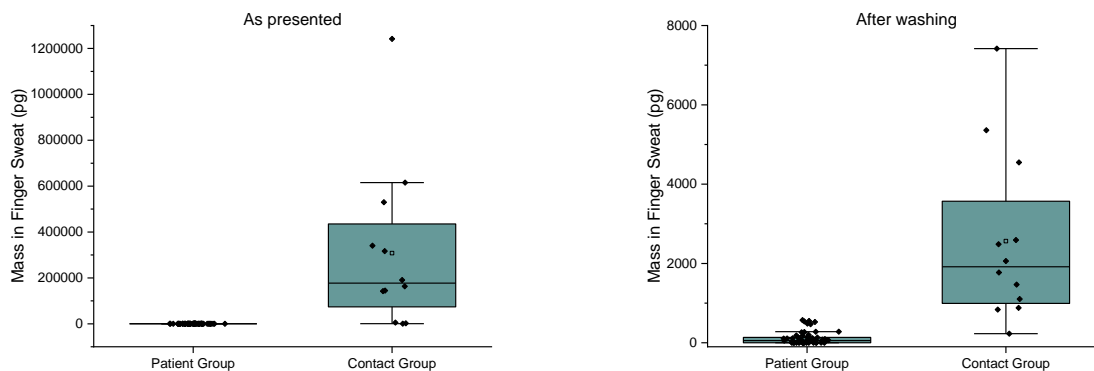

**Supplemental Figure 4.** Mass of olanzapine in finger sweat in samples collected ‘as presented’ and ‘after washing’ from  $n = 20$  patients and  $N = 2$  volunteers. Contact study includes samples from both left and right hands, used to handle the tablet (right hand) and to rub the powder into the fingertips (left hand).
